# Supplementary material for: In vivo extracellular recordings of thalamic and cortical visual responses reveal V1 connectivity rules
Source: PubMed Central journal article supplement — Proc Natl Acad Sci U S A. 2022 Oct 3;119(41):e2207032119. doi: 10.1073/pnas.2207032119 (PMC9564935; doi:10.1073/pnas.2207032119), 2022-10-03
Supplement: pnas.2207032119.sapp.pdf [file pnas.2207032119.sapp.pdf]

## 1 Supplementary Information

### 2 Details about experimental data acquisition and analysis

3 All procedures complied with the European Communities Council Directive 2010/63/EU and the German  
4 Law for Protection of Animals, and were approved by local authorities, following appropriate ethics review.

### 5 Animals

6 Recordings were performed in 4 adult male Ntsr1-Cre mice (3 hemizygous Tg, 1 negative control, me-  
7 dian age at first recording session: 24.4 weeks; B6.FVB(Cg)-Tg(Ntsr1-cre)GN220Gsat/Mmcd; MMRRC,  
8 #030648-UCD) and 2 (1 male, 1 female) PV-Cre mice (median age: 17.9 weeks; B6.129P2-Pvalb<sup>tm1(cre)Arbr/J</sup>;  
9 Jackson Laboratory, #017320).

### 10 Surgery

11 The surgical procedures are described in detail in [1]. In brief: mice were administered an analgesic  
12 (Metamizole, 200 mg/kg, sc, MSD Animal Health, Brussels, Belgium) and put under isoflurane anesthesia  
13 (5% in oxygen at start, then lowered to 0.5%–2% in oxygen, CP-Pharma, Burgdorf, Germany), the depth  
14 of which was constantly monitored. After shaving and disinfecting the scalp, a skin incision was performed  
15 and the skull cleaned of any remaining tissue. Upon positioning the head in a skull-flat position, a custom  
16 lightweight aluminium head bar with an opening over dLGN and V1 was placed on the skull and fixated using  
17 dental cement. For V1 recordings and optogenetic stimulation unrelated to this study in PV-Cre mice, a small  
18 craniotomy above V1 was performed and ~ 0.2μL of pAAV9/1.EF1a.DIO.hChR2(H134R)-eYFP.WPRE.hGH  
19 (Addgene, #20298-AAV9) dyed with fast-green (Sigma-Aldrich, St. Louis, USA) was injected through the  
20 entire depth of the cortex. In the Ntsr1-Cre mice used for additional V1 and dLGN recordings, a similar  
21 craniotomy was performed and ~ 0.35μL of stGtACR2 (rAAV2/1-pAAV-hSyn1-SIO-stGtACR2-FusionRed,  
22 Addgene, #105677) were injected in the infragranular layers of cortex for experiments with suppression  
23 of corticothalamic feedback unrelated to the current study. Post-injection, the opening was filled with Kwik-  
24 Cast (WPI Germany, Berlin, Germany). Long-term analgesic (Meloxicam, 2 mg/kg, sc, Böhringer Ingelheim,  
25 Ingelheim, Germany) was administered and continued to be administered for 3 consecutive days. After at  
26 least 1 week of recovery, animals were gradually habituated to the experimental setup, by first handling  
27 them and then simulating the experimental procedure. To allow for virus expression, neural recordings  
28 started no sooner than 3 weeks after injection. On the day prior to the first day of recording, mice were  
29 fully anesthetized using the same procedures as for the initial surgery, and a craniotomy (ca. 1.5 mm<sup>2</sup>) was  
30 performed over dLGN and/or V1, and re-sealed with Kwik-Cast. As long as the animals did not show signs  
31 of discomfort, the long-term analgesic Metacam was administered only once at the end of surgery, to avoid  
32 any confounding effect on experimental results. Recordings were performed daily and continued for as long  
33 as the quality of the electrophysiological signals remained high.

### 34 Experimental setup

35 Our experimental configuration for *in-vivo* recordings is described in detail in [1]. In brief: mice were head-  
36 fixed and could run freely on an air-suspended styrofoam ball while stimuli were presented to the right  
37 visual field on a gamma-corrected LCD screen. Extracellular neural signals were recorded with 32-channel  
38 silicon probes (Neuronexus, A1x32Edge-5mm-20-177-A32, Ann Arbor, USA) for the 4 Ntsr1-Cre mice, a  
39 32-channel silicon probe for one PV-Cre mouse (A1x32-Edge-5mm-20-177-A32 and A1x32Edge-5mm-20-  
40 177-A32), and a 64-channel silicon probe (A1x64-Poly2-6mm-23s-160-A64) for the other PV-Cre mouse.  
41 Ball movements were registered at 90 Hz by two optical mice connected to an Arduino-type microcontroller.  
42 Eye movements were monitored under infrared light illumination.

43 For photostimulation of V1 PV+ inhibitory interneurons, an optic fiber (910 μm diameter, Thorlabs, Newton,  
44 USA) was coupled to a light-emitting diode (LED, center wavelength 470 nm, M470F1, Thorlabs, Newton,  
45 USA) and positioned with a micromanipulator less than 1 mm above the exposed surface of V1. A black

46 metal foil surrounding the tip of the head bar holder prevented the photostimulation light from reaching the  
47 animal's eyes.

### 48 **Perfusion and histology**

49 After the final recording session, mice were first administered an analgesic (Metamizole, 200 mg/kg, sc,  
50 MSD Animal Health, Brussels, Belgium) and following a 30 min wait period were transcardially perfused  
51 under deep anesthesia using a cocktail of Medetomidin (0.5 mL/kg), Midazolam (1 mL/kg), and Fentanyl  
52 (1 mL/kg) (ip). Perfusion was first done with Ringer's lactate solution followed by 4% paraformaldehyde  
53 (PFA) in 0.2 M sodium phosphate buffer (PBS).

54 To verify recording site and virus expression, we performed histological analyses. Brains were removed,  
55 postfixed in PFA for 24 h, and then rinsed with and stored in PBS at 4°C. Slices (40  $\mu$ m) were cut using  
56 a vibrotome (Leica VT1200 S, Leica, Wetzlar, Germany), mounted on glass slides with Vectashield DAPI  
57 (Vector Laboratories, Burlingame, USA), and coverslipped. A fluorescent microscope (BX61 Systems Mi-  
58 croscope, Olympus, Tokyo, Japan) was used to inspect slices for the presence of yellow fluorescent protein  
59 (eYFP) and Dil. Recorded images were processed using FIJI [2], [3].

### 60 **Stimulus**

61 We used custom software (EXPO, <https://sites.google.com/a/nyu.edu/expo/home>) to present visual stimuli  
62 on a gamma-calibrated liquid crystal display (LCD) monitor (Samsung SyncMaster 2233RZ; mean lumi-  
63 nance 50 cd/m<sup>2</sup>, 60 Hz) at 25 cm distance to the animal's right eye (spanning  $\sim 108 \times 66^\circ$ , small angle  
64 approximation). Mice were presented with three 12 min random sequences of briefly flashed (84 ms),  
65 full-screen grating stimuli. The random sequences were drawn from 2304 unique gratings covering 12 ori-  
66 entations (0, 15, 30, 45, 60, 75, 90, 105, 120, 135, 150, 165°), 8 contrasts (0, 0.04, 0.10, 0.19, 0.30, 0.46, 0.69,  
67 1), 6 spatial frequencies (0.01, 0.02, 0.06, 0.14, 0.33, 0.80 cyc/°) and 4 spatial phases (0, 90, 180, 270°).  
68 One sequence consisted of 9216 gratings. Between the sequences, a blank gray screen was displayed  
69 for 1 min. For V1 recordings in PV-Cre mice expressing ChR2, light pulses (10 Hz, 1 ms pulses) were  
70 delivered from the optical fiber during these periods; analyses of the blank screen responses or photostim-  
71 ulation effects were not included in the current study. Typically, the stimulus sequence was presented once  
72 per electrode penetration, except in two cases, where the sequence was run twice during one electrode  
73 penetration but data from each run was analyzed separately.

### 74 **Experimental data pre-processing and spike sorting**

75 Wideband extracellular signals were digitized at 30 kHz (Blackrock microsystems, Blackrock Microsystems  
76 Europe GmbH, Hannover DE). To obtain single unit activity from extracellular recordings, the open source,  
77 Matlab-based, automated spike sorting toolbox Kilosort [4] was used. Resulting clusters were manually  
78 refined using Spyke [5], a Python application that allows the selection of channels and time ranges around  
79 clustered spikes for realignment, as well as representation in 3D space using dimension reduction (multi-  
80 channel PCA, ICA, and/or spike time). Exhaustive pairwise comparisons of similar clusters allowed merg-  
81 ing of potentially over-clustered units. All further analyses were performed using an SQL data base and a  
82 custom-made analysis pipeline programmed in python [6] and managed via datajoint [7].

### 83 **Spike waveshape analysis**

84 From the mean waveform of the maximum-response electrode channel of each single unit, the time between  
85 trough and peak (rise time) and the half-width at half-height of the peak were calculated. Exploiting the  
86 waveshapes of all V1 units processed using the same pipeline (N = 428 from 10 mice), a k-means algorithm  
87 was used to cluster the data into 2 populations.

### 88 **Optogenetic tagging**

89 To test whether our spike waveshape-based classification method was able to identify PV+ interneurons, we

90 performed a quantitative analysis of optogenetic tagging. We used the stimulus-associated spike latency  
 91 test (SALT) method [8] to identify PV+ interneurons via short-latency, light-induced spikes. The algorithm  
 92 compares the latency distribution of the first spike in a 10 ms window after an optical pulse with baseline  
 93 distributions before the optical pulse via the Jensen-Shannon divergence. We adapted the algorithm to  
 94 sample baseline distributions during continuous pulse trains and required identified neurons to have low  
 95 latency ( $L < 4$  ms), high reliability ( $R > 0.1$ ) and small jitter ( $J < 2$  ms). Using this method, we found that  
 96 with the exception of one significantly tagged neuron, all putative PV+ interneurons were contained in the  
 97 cluster with narrow waveshapes.

### 98 **Laminar location**

99 We used current source density (CSD) analysis [9] for recordings in area V1 to determine the laminar  
 100 position of electrode contacts. To obtain the LFP, we first down-sampled the signal to 1 kHz before applying  
 101 a bandpass filter (3–90 Hz, second-order Butterworth filter). We computed the CSD using the iCSD method  
 102 [10] implemented in `eLephant` [(RRID:SCR\_003833) 11]. We assigned the base of layer 4 to the contact  
 103 that was closest to the earliest CSD polarity inversion. The remaining contacts were assigned to layers  
 104 based on relative layer thickness reported by [12], assuming a thickness of 1.2 mm for mouse visual cortex.  
 105 Across all V1 sessions with CSD analysis, the resulting distribution of neurons across layers was: L2/3 -  
 106 10/131 (7.6%), L4 - 29/131 (22.1%), L5 - 47/131 (35.9%), L6 - 45/131 (34.4%).

### **Temporal response kernels via reverse correlation**

After eliminating units with overall very low firing rate ( $< 0.1$  Hz), the probability of a stimulus preceding a  
 spike by a time  $\delta t$  from -50 to 350 ms was computed for each unique grating stimulus. This was done by  
 binning spike times in 1 ms windows and then counting how often a specific stimulus occurred  $\delta t$  before a  
 spike. After normalizing this histogram by dividing by the total number of spikes, the posterior distribution  
 was calculated according to Bayes' theorem by multiplying with the probability of a spike occurring and  
 dividing by the probability of the stimulus occurring:

$$\begin{aligned}
 P(\text{Spike}|\text{Grating}) &= \frac{P(\text{Grating}|\text{Spike}) \cdot P(\text{Spike})}{P(\text{Grating})} \\
 &= \frac{\frac{\text{Grating And Spike Bins}}{\text{Total Spike Bins}} \cdot \frac{\text{Total Spike Bins}}{\text{Total Bins}}}{\frac{\text{Grating Bins}}{\text{Total Bins}}} \\
 &= \frac{\text{Grating And Spike Bins}}{\text{Grating Bins}}
 \end{aligned}$$

107 By dividing by the 1 ms bin duration, the resulting probabilities could be directly converted to firing rates and  
 108 thus give a temporal response kernel for each unique grating stimulus.

### 109 **Determining visual responsiveness**

110 To eliminate non-responsive or noise-dominated units, the variance of the temporal kernels across stimuli  
 111 was calculated and tested for non-randomness using the Wald-Wolfowitz-Test (WWT). The WWT uses the  
 112 distribution of consecutive ones and zeros in a binary sequence, which should follow a normal distribution  
 113 in a random sequence, to statistically determine randomness of the sequence. The test can be applied to  
 114 a non-binary sequence by converting it to a binary sequence via a threshold criterion, typically the mean or  
 115 median. Before applying the WWT, global trends in the sequence should be removed by either filtering or  
 116 applying an approximation of the derivative. As the response to grating contrast is a robust indicator of visual  
 117 responsiveness, the analysis was performed using the aggregate variance across grating contrast, which  
 118 was computed by averaging the kernels across grating orientation, spatial frequency and spatial phase,  
 119 before computing the variance across the resulting contrast kernels. To further increase signal-to-noise  
 120 ratio, the partial variance was squared before computing the differences across time to remove any global  
 121 trends. On the resulting sequence, the WWT was performed using the median as cutoff criterion. Because  
 122 the WWT can miss narrow peaks, even if they are high, a second WWT was computed on the absolute  
 123 values of the sequence. A unit was classified as visually responsive if one of the WWT's was significant and

124 the test statistic of both WWT's was negative, indicating fewer sign changes than expected by chance.

### 125 **Determining optimal time point**

126 The time point of optimal response was determined via the peak of the summed aggregate variances across  
127 stimuli. First, the partial variances were computed for all four stimulus parameters as described above for  
128 grating contrast. The resulting partial variances were then summed and the time point of the first peak  
129 exceeding half the modulation depth of the result was selected as the optimal response time point  $\delta t_{opt}$   
130 [peak detection using `scipy`, 13]. For the V1 data set, we removed 7 neurons for which the analysis  
131 revealed implausibly short optimal response latencies ( $\leq 25$  ms). We based this minimal latency cutoff on  
132 the distribution of optimal time points (5 ms bins) of all recorded V1 neurons, and chose as the cutoff the  
133 first bin with at least 3 neurons ( $> 25$  ms). For the dLGN neurons, this minimal latency cutoff removed  
134 3 neurons.

### 135 **Response profiles**

136 In a 20 ms window around  $\delta t_{opt}$ , responses were averaged over grating spatial phase and frequency,  
137 resulting in two-dimensional response matrices covering grating orientation and contrast.

### 138 **Contrast-invariance**

139 Contrast-invariance of a unit was assessed by applying a singular value decomposition (SVD) to its re-  
140 sponse matrix, separating the SVD's principle component and residual, and computing the Gamma index  
141 of spatial autocorrelation on the residual [14]. The Gamma index is computed by computing a similarity  
142 matrix for all data points and then masking the similarity matrix with a contiguity matrix that considers data  
143 points that share an edge to be neighbors. The index itself is the sum of all entries in the masked similarity  
144 matrix. Patterns are detected by randomly shuffling data points and comparing the original index against the  
145 resulting distribution. The strength of the first SVD component was assessed as its power in the SVD: the  
146 quotient between the squared first singular value and the sum of squares over all singular values. Residual  
147 strength was then computed as one minus first component power. The SVD was calculated using `numpy`  
148 [15] and the Gamma index using `pysal` [16]. Neurons with a z-scored Gamma index  $g_z > 1.96$  and  
149 residual strength  $p > 0.05$  were classified as contrast-dependent.

### 150 **Tuning model**

151 Contrast invariant units were fitted with a two-dimensional tuning model consisting of a hyperbolic ratio  
152 function with supersaturation parameter [17] and a wrapped Gaussian [18]:

$$r(c, \psi, \theta) = r_0 + (r_{max} - r_0) \cdot \frac{c^n}{c_{50}^{s \cdot n} + c^{s \cdot n}} \cdot \sum_{m=-\infty}^{m=\infty} \exp \left\{ \frac{-(\psi - \theta + \pi m)^2}{2\sigma^2} \right\}, \quad (S1)$$

153 where  $c$  is stimulus contrast,  $\psi$  is the stimulus orientation,  $\theta$  the preferred orientation,  $r_0$  the baseline re-  
154 sponse and  $r_{max}$  the peak response of the neuron. The tuning model was fitted to each neuron's response  
155 matrix in a least-squared sense using the `scipy.optimize` library. Quality of fit was assessed via the  
156 coefficient of determination ( $r^2$ ) and only units with  $r^2 > 0.4$  were used for further analysis. For character-  
157 izing the selectivity of neurons to orientation and contrast, we considered the individual tuning components  
158 of the fitted 2D tuning model, after normalizing by the maximal response.

159 Width parameters of orientation tuning functions,  $\sigma$  in our case, scale non-linearly when tuning is either  
160 strong or weak, depending on the specific function. When quantitatively analysing data that contains a  
161 broad spectrum of tuning, it is thus advisable to use measures that are not distorted by such non-linear  
162 scaling. Accordingly, orientation selectivity [19], [20] was quantified as

$$OSI = \frac{\sqrt{(\sum R_k \sin(2\theta_k))^2 + (\sum R_k \cos(2\theta_k))^2}}{\sum R_k} \quad (S2)$$

163 where  $R_k$  is the response to the  $k$ th direction given by  $\theta_k$ .

164 Contrast sensitivity was quantified as contrast at half height of the contrast response function. Since some of  
 165 our recorded contrast response functions did not saturate, even for full contrast, we preferred this measure  
 166 as opposed to the parameter  $c_{50}$  of the hyperbolic ratio function.

167 For our sample of recorded neurons, the analysis of contrast response functions revealed neurons in both  
 168 dLGN and V1 whose response was suppressed by contrast (SbC, Fig. S2). Considering our dataset of  
 169 contrast-invariant dLGN and V1 neurons, which were well-fit by our descriptive, separable model, SbC  
 170 neurons amounted to 19% of the dLGN population, and 19% of the V1 E population, with no SbC neurons  
 171 in the V1 I population. The function of SbC neurons is not well understood: 1) it seems likely that V1 SbC  
 172 neurons might constitute both E and I neurons, being contained within the L6 corticothalamic pyramidal cell  
 173 population [21], the inhibitory vasoactive intestinal peptide-expressing (VIP) population [22], [23] or a so-far  
 174 minimally studied class of Sncg inhibitory interneurons [23], 2) stimulus selectivity of SbC neurons is broad  
 175 and their response latencies are long, and 3) SbC neurons currently are not considered in computational  
 176 models of V1 [24] such as the SSN. In control analyses, we have repeated our inference procedure with  
 177 dLGN and V1 E populations additionally containing the SbC neurons (data not shown). These analyses  
 178 revealed that the order of inferred weights was largely preserved, even when SbC neurons were included  
 179 in the populations. Given the uncertainty in terms of V1 cell type associated to SbC neurons, and the  
 180 conceptual difficulties of incorporating into the SSN one or more potentially distinct populations of SbC  
 181 neurons, we decided to continue our analyses using only neurons whose responses were enhanced by  
 182 contrast.

183 To construct population tuning curves for orientation and contrast, individual orientation and contrast tuning  
 184 curves were averaged, after aligning individual neurons to their preferred orientation. Population contrast-  
 185 invariance was assessed by applying the above explained SVD and spatial autocorrelation analysis to the  
 186 population tuning curves.

## 187 **Statistics**

188 All statistics were performed using functions from `scipy.stats` and `statsmodels`.

## 189 **Determining populations' responses from the recorded data for the SSN model fit**

190 The hyperbolic ratio function used to describe and quantify the recorded contrast responses imposes a  
 191 sigmoidal shape on the contrast response. However, the output of the SSN model itself can explain how  
 192 S-shaped contrast responses arise from a recurrent network wiring. Therefore, to avoid an additional fitting  
 193 bias, we did not use the hyperbolic ratio function to represent the recorded populations' responses before  
 194 we fitted the SSN model to the data. To determine E, I and thalamic population responses to a stimulus of  
 195 orientation  $\psi$ , the function

$$R(c_i, \psi - \theta) = r_0 + (r(c_i) - r_0) \cdot \sum_{m=-\infty}^{\infty} \exp \left\{ \frac{-(\psi - \theta + \pi m)^2}{2\sigma^2} \right\} \quad (\text{S3})$$

196 was fitted to the two-dimensional contrast and orientation responses of individual units to determine the  
 197 contrast response functions  $r(c_i)$  at eight contrast values  $c_i$  as well as the width  $\sigma$  of orientation tuning  
 198 curves (see Swindale [18] for justification of wrapped Gaussian fit). Then the responses of the units were  
 199 aligned such that their preferred orientations  $\theta$  coincided with  $0^\circ$ . The E, I, and thalamic population contrast  
 200 responses at each contrast value  $c_i$  in (Fig. 3) were computed as an average  $r(c_i)$  in the corresponding  
 201 population. The population orientation tuning widths were computed as an average  $\sigma$  over the correspond-  
 202 ing population.

## 203 **SSN model with two populations, stability of steady states**

204 The two population SSN model is given by the equations

$$\tau_X \cdot \frac{dr_X(t, C)}{dt} + r_X(t, C) = \left( J_{XE} \cdot r_E(t, C) - J_{XI} \cdot r_I(t, C) + T_{dLGN}(C) \cdot g_X \right)_+^n, \quad X \in \{E, I\}. \quad (S4)$$

The steady states  $r_E(C)$  and  $r_I(C)$  defined by the equations ( $dr_X/dt = 0$ )

$$r_X(C) = \left( J_{XE} \cdot r_E(C) - J_{XI} \cdot r_I(C) + T_{dLGN}(C) \cdot g_X \right)_+^n, \quad X \in \{E, I\}. \quad (S5)$$

are stable exactly when the inequalities

$$J_{EE}r_E^{1-1/n} - (n \cdot \det J \cdot r_E^{1-1/n} + J_{II})r_I^{1-1/n} < 1/n \quad (S6)$$

and

$$\tau_E + \tau_I + \tau_E J_{II} n r_I^{1-1/n} - \tau_I J_{EE} n r_E^{1-1/n} > 0 \quad (S7)$$

205 are fulfilled [25]. To guarantee stability of the fitted firing rates, we incorporated the inequality in Eq. **S6** in  
 206 the parameter inference algorithm. We note that the second inequality in Eq. **S7** can always be fulfilled if  
 207 we choose sufficiently large  $\tau_E$  and/or small  $\tau_I$ .

## 208 Determining the two-population SSN parameters from contrast responses

209 The SSN model with the initially unknown parameters  $J_{XY}$ ,  $g_X$ , and  $n$  was required to generate stable  
 210 steady states  $r_X(C)$  (Eq. **S5** - Eq. **S7**), which closely approximated the average recorded cortical and  
 211 thalamic contrast responses (Eq. **S3**). For each fixed  $n$  and eight contrasts  $C$ , Eq. 1 represented an over-  
 212 determined system of 16 linear equations with six unknown connectivity weights  $J_{XY}$ ,  $g_X$ , which always has  
 213 a unique solution. We called this solution valid, if additionally, the constants  $J_{XY}$ ,  $g_X$  were positive and lead  
 214 to a stable steady state of the SSN model. We note that the weights computed directly from the average  
 215 V1 and thalamic contrast responses did not lead to any valid solutions for the exponents  $n$  ranging from 1.1  
 216 to 5. Therefore, we randomly generated triplets of V1 and thalamic contrast response curves within  $\pm$ sem  
 217 error bar areas of the contrast responses and computed corresponding sets of the connectivity weights  
 218  $J_{XY}$ ,  $g_X$  as solutions of the over-determined linear system in Eq. 1 for each triplet. Overall, the fraction of  
 219 valid connectivity weights was less than 0.1% for all  $n$ , and was a monotonically increasing function of  $n$   
 220 with few valid fits found for  $n$  close to 1 (Fig. **S5A**). Since the initial SSN parameters  $J_{XY}$ ,  $g_X$ , and  $n$  were  
 221 computed for random response triplets and not for the average contrast responses, we optimized them to  
 222 closely approximate the average responses by minimizing the score function

$$\text{Score}_{\text{fit}}(J, g, n) = \frac{1}{F(n)} \sum_{i=1}^8 \frac{(r_E^{\text{fit}}(C_i) - r_E^{\text{av}}(C_i))^2}{\sigma_E^2(C_i)} + \frac{(r_I^{\text{fit}}(C_i) - r_I^{\text{av}}(C_i))^2}{\sigma_I^2(C_i)} + \frac{(T_{dLGN}^{\text{fit}}(C_i) - T_{dLGN}^{\text{av}}(C_i))^2}{\sigma_{dLGN}^2(C_i)}. \quad (S8)$$

223 Based on the score function (Eq. **S8**), the contrast responses with smaller standard deviation  $\sigma_X$  were  
 224 approximated with higher precision than those with larger standard deviation. We note that as expected,  
 225 lower firing rates had lower variability in our recordings. We divided the difference between the fit and the  
 226 recorded average by the fraction of valid fits  $F$  as a function of  $n$  to reinforce the exponents  $n$  leading to a  
 227 larger fraction of initial valid fits. Each parameter set  $J_{XY}$ ,  $g_X$ ,  $n$  in the final distribution of  $10^3$  fits was a  
 228 parameter set with the best score out of  $10^4$  optimized randomly generated valid initial fits.

## 229 The external input weight $g_I$ exceeds $g_E$ according to experimental connectivity measurements in 230 Ji et al. [26]

231 We determined the relation between the parameters  $g_E$  and  $g_I$  based on the connectivity measurements  
 232 published in Ji et al. [26]. The V1 E neurons received direct thalamic input with the probabilities 15/19 in

233 layer 2/3, 19/19 in layer 4, 8/8 in layer 5, and 7/9 in layer 6 [26]. The V1 I neurons received direct thalamic  
 234 input with the probabilities 14/17 in layer 2/3, 15/15 in layer 4, 15/15 in layer 5, and 9/11 in layer 6 [26]. The  
 235 adjusted peak amplitudes of postsynaptic potentials amounted to  $190 \pm 78 \text{ pA}$  for E and  $475 \pm 178 \text{ pA}$  for I V1  
 236 populations in layer 2/3,  $430 \pm 97 \text{ pA}$  for E and  $1111 \pm 260 \text{ pA}$  for I cortical populations in layer 4,  $190 \pm 73 \text{ pA}$   
 237 for E and  $596 \pm 178 \text{ pA}$  for I cortical populations in layer 5, and  $160 \pm 49 \text{ pA}$  for E and  $412 \pm 167 \text{ pA}$  for I  
 238 cortical populations in layer 6 [26]. In total, the experimentally measured  $g_I$  was higher than  $g_E$  in all layers  
 239 2/3, 4, 5 and 6 (Fig. 4A).

240 **The connectivity weight  $J_{EE}$  exceeds the external input weight  $g_E$  based on activity recordings in**  
 241 **Lien et al. [27]**

Lien et al. [27] reported that the upper bound for the contribution of thalamic inputs compared to the total postsynaptic charge of the E cortical neurons was  $36 + 2\%$  for full screen, 100% contrast drifting gratings, [see also 28], [29]. We used the upper bound of 38% to estimate an experimentally plausible region for the relation  $g_E/J_{EE}$  in Fig. 4B. Here, we assumed that the relative contribution of the thalamic input  $g_E \cdot T_{\text{dLGN}}$  to the E population with respect to the total input to E population  $J_{EE} \cdot r_E - J_{EI} \cdot r_I + g_E \cdot T_{\text{dLGN}}$  was smaller than 38%. Using the estimate

$$\frac{g_E \cdot T_{\text{dLGN}}}{J_{EE} \cdot r_E + g_E \cdot T_{\text{dLGN}}} < \frac{g_E \cdot T_{\text{dLGN}}}{J_{EE} \cdot r_E - J_{EI} \cdot r_I + g_E \cdot T_{\text{dLGN}}} < 0.38,$$

we computed the approximate upper bound for the relation  $g_E/J_{EE}$

$$\frac{g_E}{J_{EE}} < \frac{0.38}{1 - 0.38} \cdot \frac{r_E}{T_{\text{dLGN}}} \approx 0.55.$$

242 Here we used the firing rates  $r_E$  and  $T_{\text{dLGN}}$  recorded in our experiments for 100% of contrast.

243 **Connectivity weights  $J_{XY}$  computed from the experimental connectivity measurements reviewed in**  
 244 **Table S1**

245 The weights of the network connectivity matrix  $J_{XY}$  were computed as a product of connection proba-  
 246 bility (CP), strength of postsynaptic potential (PSP), and the fraction of neurons in the source population  
 247 with respect to the total number of neurons included in the network model. The data was extracted from  
 248 experimental sources introduced in the first rows of **Table S1** for the layers 2/3, 4, 5, and 6. We note  
 249 that only two experimental reports contained complete information on both connectivity measures for all  
 250 four V1 connections in layers 2/3 and 5 [30], [31], and only one source on connectivity measures in lay-  
 251 ers 4 and 6 [30]. We assumed that our network contained 89% of excitatory and 11% of PV+ neurons,  
 252 based on the following calculation: The V1 network consists of approximately 80% of excitatory and 20%  
 253 of inhibitory neurons. A survey of inhibitory subpopulations in V1 [32] reported that PV+ neurons con-  
 254 stitute 37, 49, 53, and 42% of inhibitory neurons in layers 2/3, 4, 5, and 6, respectively. 10 out of 131  
 255 recorded neurons belonged to the layer 2/3, 29 to layer 4, 47 to layer 5, and 45 to layer 6. We computed  
 256 the fraction of PV+ neurons in inhibitory population as the weighted percentage of the recorded neurons  
 257  $(10 \cdot 0.37 + 29 \cdot 0.49 + 47 \cdot 0.53 + 45 \cdot 0.42)/131 \approx 0.47$ . Thus, the percentage of PV+ neurons in our cortical  
 258 network is  $0.47 \cdot 20 / (80 + 0.47 \cdot 20) \cdot 100\% \approx 11\%$ .

259 **The external input weight  $g_I$  exceeds  $g_E$  in the SSN model if the firing rate  $r_I$  increases faster than**  
 260  **$r_E$  for low contrasts**

261 We express the thalamic input  $T_{\text{dLGN}}$  using both equations in Eq. 1

$$T_{\text{dLGN}}(C) = \frac{r_E(C)^{\frac{1}{n}} - J_{EE} \cdot r_E(C) + J_{EI} \cdot r_I(C)}{g_E} = \frac{r_I(C)^{\frac{1}{n}} - J_{IE} \cdot r_E(C) + J_{II} \cdot r_I(C)}{g_I}. \quad (\text{S9})$$

262 Eq. S9 implies

$$r_E(C)^{\frac{1}{n}} + (g_E J_{IE}/g_I - J_{EE}) \cdot r_E(C) = g_E/g_I \cdot r_I(C)^{\frac{1}{n}} + (g_E J_{II}/g_I - J_{EI}) \cdot r_I(C). \quad (\text{S10})$$

263 For low contrasts and small firing rates, the terms  $r_X$  are much smaller than  $r_X^{\frac{1}{n}}$  and have a negligible impact  
 264 on Eq. S10 (Fig. S6A). Since  $r_I^{\frac{1}{n}} > r_E^{\frac{1}{n}}$ , the inequality  $g_E < g_I$  has to be satisfied to fulfill Eq. S10 for small  
 265 contrasts.

266 **The ISN condition for SSN model implies that  $J_{EI}$  exceeds the external input weight  $g_E$  in the SSN**  
 267 **model**

268 Experiments show that the V1 circuit in mouse operates as an inhibition stabilized network [33]. The condi-  
 269 tion [34]

$$J_{EE} > \frac{1}{n} r_E^{\frac{1}{n}-1} \quad (\text{S11})$$

270 guaranties that the network given by the SSN model is inhibition stabilized. The 100% of the inferred  
 271 connectivity weights satisfied the ISN condition Eq. S11 starting from the smallest contrast value of 4%,  
 272 Fig. S5C. To derive the relation between the weights  $J_{EI}$  and  $g_E$ , we compute the derivative with respect to  
 273 the contrast of the first SSN steady state equation in Eq. 1

$$\left(\frac{1}{n} r_E^{\frac{1}{n}-1} - J_{EE}\right) \cdot r'_E = -J_{EI} \cdot r'_I + g_E \cdot T'_{\text{dLGN}}. \quad (\text{S12})$$

274 We observe in our recorded data that for small and intermediate values of the contrast the dLGN contrast  
 275 response grows faster than the I firing rate  $r_I$  meaning that here  $T'_{\text{dLGN}}$  exceeds  $r'_I$  (Fig. S6B). Thus, using  
 276 the ISN condition Eq. S11 and the SSN steady state equation in Eq. S12 we obtain for these contrast values

$$0 > \left(\frac{1}{n} r_E^{\frac{1}{n}-1} - J_{EE}\right) \cdot r'_E > (g_E - J_{EI}) \cdot r'_I. \quad (\text{S13})$$

277 Since both E and I firing rates of cortical populations increase monotonically with contrast, their derivatives  
 278  $r'_E$  and  $r'_I$  are positive. Thus, the Eq. S13 implies that the connectivity weight  $J_{EI}$  exceeds  $g_E$  in the SSN  
 279 model when the SSN satisfies ISN condition and there exist an interval of contrasts, for which the dLGN  
 280 firing rate grows faster than the I population firing rate as in our activity recordings (Fig. S6B).

281 **The shapes of contrast responses in V1 and dLGN imply relations  $J_{EI} < J_{EE}$ ,  $g_E < J_{EE}$ ,  $J_{II} < J_{IE}$**   
 282 **and  $g_I < J_{IE}$**

283 Let  $f[0, 1] \rightarrow [0, \infty)$  with  $f(0) = 0$  denote the contrast response function. The recorded contrast response  
 284 functions are typically nonlinear, resembling the logistic function in their shape. They deviate from the line  
 285 connecting the points 0 and  $f(1)$  given by  $Cf(1)$  for every contrast  $C$ . The function  $L_f$  defined by

$$L_f(C) = f(C)/C - f(1) \quad (\text{S14})$$

286 quantifies how far the contrast response  $f(C)$  at a contrast value  $C$  deviates from the line which connects  
 287 the points 0 and  $f(1)$ . If  $L_f(C)$  is positive (negative) at  $C$ , the recorded contrast response  $f(C)$  lies above  
 288 (below) the line connecting 0 and  $f(1)$ .

We use the SSN steady state equations Eq. S9 to obtain

$$\begin{aligned} -\frac{L_{T_{\text{dLGN}}}(C)}{L_{r_E}(C)} g_E + \frac{L_{r_I}(C)}{L_{r_E}(C)} J_{EI} + \frac{L_{r_E^{1/n}}(C)}{L_{r_E}(C)} &= J_{EE}, \\ -\frac{L_{T_{\text{dLGN}}}(C)}{L_{r_E}(C)} g_I + \frac{L_{r_I}(C)}{L_{r_E}(C)} J_{II} + \frac{L_{r_I^{1/n}}(C)}{L_{r_E}(C)} &= J_{IE}. \end{aligned} \quad (\text{S15})$$



If for some  $C$

$$L_{T_{\text{dLGN}}}(C) > 0, \quad L_{r_E}(C), L_{r_I}(C) < 0, \quad L_{T_{\text{dLGN}}}(C) > |L_{r_I}(C)| > |L_{r_E}(C)|, \quad (\text{S16})$$

and in the case of positive  $L_{r_E}^{1/n}(C)$  and  $L_{r_I}^{1/n}(C)$

$$\min\{g_E, J_{EI}, g_I, J_{II}\} \geq 1, \quad \min\{L_{T_{\text{dLGN}}}(C), |L_{r_I}(C)|\} > \max\{L_{r_E}^{1/n}(C), L_{r_I}^{1/n}(C)\} \quad (\text{S17})$$

289 we obtain  $J_{EI} < J_{EE}$ ,  $g_E < J_{EE}$ ,  $J_{II} < J_{IE}$  and  $g_I < J_{IE}$ .

290 The conditions in Eq. S16 and Eq. S17 hold for the contrast values 30% and 46%, while 99.8% of all inferred  
291 connectivity weights satisfy Eq. S17.

### 292 Contrast invariance constrains connectivity and input profiles

293 We denote  $\phi \equiv \psi - \theta$ ,  $\phi' \equiv \psi - \theta'$  and show that the property of contrast invariance (Eq. 3)

$$R_X(\phi, C) = r_X(C) \tilde{r}_X(\phi), \quad X \in \{E, I\} \quad (\text{S18})$$

294 combined with steady state equations Eq. 2 leads to equations in Eq. 4, which relate orientation tuning  
295 curves  $\tilde{r}_X$  with connectivity and input profiles  $W_{XY}$  and  $L_X$ .

296 The steady-state equations of the extended SSN model in Eq. 2 are given by

$$R_X(\phi, C) = \left( \int_{-\pi/2}^{\pi/2} W_{XE}(\phi - \phi') R_E(\phi', C) d\phi' - \int_{-\pi/2}^{\pi/2} W_{XI}(\phi - \phi') R_I(\phi', C) d\phi' + T_{\text{dLGN}}(C) L_X(\phi) \right)_+^n \quad (\text{S19})$$

297 We insert the contrast invariant representation of steady states (Eq. S18) into (Eq. S19) and divide Eq. S19  
298 by  $\tilde{r}_X(\phi)$  to obtain

$$r_X(C) = \left( J_{XE}(\phi) r_E(C) - J_{XI}(\phi) r_I(C) + T_{\text{dLGN}}(C) g_X(\phi) \right)_+^n, \quad (\text{S20})$$

299 where  $J_{XY}(\phi) = \int_{-\pi/2}^{\pi/2} W_{XY}(\phi - \phi') \tilde{r}_Y(\phi') d\phi' / (\tilde{r}_X(\phi))^{1/n}$  and  $g_X(\phi) = L_X(\phi) / (\tilde{r}_X(\phi))^{1/n}$ .

300 Now we show that  $g_X$  are constants independent of  $\phi$ , then we show that  $J_{XY}$  are constants provided the  
301 contrast response functions are not exactly linearly dependent, i.e.  $r_E$  and  $r_I$  do not satisfy  $r_E(C) = a \cdot r_I(C)$   
302 for all contrasts  $C$  with some constant  $a$ . We prove this statement by contradiction, i.e. we assume there is  
303 at least one parameter  $J_{XY}$  or  $g_X$  such that  $J_{XY}(\phi) \neq J_{XY}(\phi')$  or  $g_X(\phi) \neq g_X(\phi')$  for some  $\phi \neq \phi'$ , and  
304 derive a contradiction.

305 First, we show that  $g_X$  are independent of  $\phi$ . We substitute  $S = T_{\text{dLGN}}(C)$  into Eq. S20

$$\tilde{r}_X(S) = \left( J_{XE}(\phi) \tilde{r}_E(S) - J_{XI}(\phi) \tilde{r}_I(S) + S g_X(\phi) \right)_+^n. \quad (\text{S21})$$

306 Here,  $\tilde{r}_X(S) = r_X(C) = r_X(T_{\text{dLGN}}^{-1}(S))$ . Since  $\tilde{r}_X$  are non-negative, the content of the bracket on the right  
307 side of the equations is positive and we can remove the sign  $+$ . Next, we apply the exponent  $1/n$  to both  
308 sides of Eq. S21 to obtain

$$(\tilde{r}_X(S))^{1/n} = J_{XE}(\phi) \tilde{r}_E(S) - J_{XI}(\phi) \tilde{r}_I(S) + S g_X(\phi). \quad (\text{S22})$$

309 Now we denote  $\widehat{J}_{XY}(\phi) = J_{XY}(\phi) - J_{XY}(\phi')$  and  $\widehat{g}_X(\phi) = g_X(\phi) - g_X(\phi')$  and subtract from Eq. S22 the  
 310 same equation with  $\phi$  substituted by  $\phi'$  to obtain

$$0 = \widehat{J}_{XE}(\phi)\widehat{r}_E(S) - \widehat{J}_{XI}(\phi)\widehat{r}_I(S) + S\widehat{g}_X(\phi). \quad (\text{S23})$$

311 Next, we compute a derivative of Eq. S23 with respect to  $S$  and set  $S = 0$ . We obtain

$$0 = \widehat{J}_{XE}(\phi)\widehat{r}'_E(S) - \widehat{J}_{XI}(\phi)\widehat{r}'_I(S) + \widehat{g}_X(\phi). \quad (\text{S24})$$

312 We note that  $\widehat{r}'_X(0) = 0$  always holds for the zero steady state of Eq. S21 corresponding to  $S = 0$  input.  
 313 Then we obtain  $\widehat{g}_X(\phi) = 0$  from Eq. S24, which by definition implies  $g_X(\phi) = g_X(\phi')$  for all  $\phi$ . We have  
 314 shown that  $g_E$  and  $g_I$  are constants independent of  $\phi$ .

315 Now we show when  $J_{XY}$  are independent of  $\phi$ . From  $\widehat{g}_E(\phi) = \widehat{g}_I(\phi) = 0$ , we obtain that Eq. S23 is  
 316 equivalent to

$$\widehat{r}_E(S)/\widehat{r}_I(S) = \widehat{J}_{EI}(\phi)/\widehat{J}_{EE}(\phi). \quad (\text{S25})$$

317 Since the left side of Eq. S25 depends only on  $S$  and the right side only on  $\phi$ , both sides are equal to the  
 318 same constant which we denote by  $a$ . In particular, this last observation implies exact linear dependence of  
 319 the contrast response functions:  $r_E(C) = a \cdot r_I(C)$ .

320 We have shown that the property of contrast-invariance Eq. 3 restricts the shape of the input functions  $L_E$   
 321 and  $L_I$  and the interaction profiles  $W_{EE}$ ,  $W_{EI}$ ,  $W_{IE}$  and  $W_{II}$  accordingly to the following relations

$$L_E(\phi) = g_E \cdot (\widetilde{r}_E(\phi))^{1/n}, \quad L_I(\phi) = g_I \cdot (\widetilde{r}_I(\phi))^{1/n}, \quad (\text{S26})$$

$$\begin{aligned} \int_{-\pi/2}^{\pi/2} W_{EE}(\phi - \phi')\widetilde{r}_E(\phi')d\phi' &= J_{EE} \cdot (\widetilde{r}_E(\phi))^{1/n}, & \int_{-\pi/2}^{\pi/2} W_{EI}(\phi - \phi')\widetilde{r}_I(\phi')d\phi' &= J_{EI} \cdot (\widetilde{r}_E(\phi))^{1/n}, \\ \int_{-\pi/2}^{\pi/2} W_{IE}(\phi - \phi')\widetilde{r}_E(\phi')d\phi' &= J_{IE} \cdot (\widetilde{r}_I(\phi))^{1/n}, & \int_{-\pi/2}^{\pi/2} W_{II}(\phi - \phi')\widetilde{r}_I(\phi')d\theta' &= J_{II} \cdot (\widetilde{r}_I(\phi))^{1/n}, \end{aligned} \quad (\text{S27})$$

322 where the constants  $g_X$  and  $J_{XY}$  depend on the shape of contrast responses  $r_E$  and  $r_I$  that are steady  
 323 states of the two population SSN model.

### 324 Determining connectivity and input profiles of the extended SSN model

To determine the input and connectivity profiles  $L_X$  and  $W_{XY}$  from Eq. S26 and Eq. S27, we used the wrapped Gaussian approximation of orientation tuning curves. The wrapped Gaussian function is given by

$$G_{(\sigma)}(\phi) = \sum_{m=-\infty}^{\infty} \exp\left\{-\frac{(\phi + \pi m)^2}{2\sigma^2}\right\}.$$

325 The widths of the orientation tuning curves  $\widetilde{r}_E$  and  $\widetilde{r}_I$  were  $\sigma_E \approx 0.31\pi \approx 56^\circ$  and  $\sigma_I \approx 0.34\pi \approx 62^\circ$   
 326 (Fig. 5B), the orientation tuning curves are represented by

$$\widetilde{r}_E(\phi) = G_{(\sigma_E)}(\phi)/\max_{\phi} G_{(\sigma_E)}, \quad \widetilde{r}_I(\phi) = G_{(\sigma_I)}(\phi)/\max_{\phi} G_{(\sigma_I)}. \quad (\text{S28})$$

327 To derive the input profiles  $L_E$  and  $L_I$  using Eq. S26, we fitted normalized wrapped Gaussian functions to  
 328 the power-law transformations of orientation tuning curves  $(\widetilde{r}_E)^{1/n}$  and  $(\widetilde{r}_I)^{1/n}$ , where  $n$  were the power-law  
 329 exponents inferred from the recorded contrast responses. We obtained that the mean widths of the curves

330  $(\tilde{r}_E)^{1/n}$  and  $(\tilde{r}_I)^{1/n}$  were  $\sigma_E^{\text{inp}} \approx 0.36\pi \approx 65^\circ$  and  $\sigma_I^{\text{inp}} \approx 0.39\pi \approx 70^\circ$ , respectively, and the input profiles  $L_E$   
 331 and  $L_I$  (Fig. 5C) were represented by

$$L_E(\phi) = g_E \cdot G_{(\sigma_E^{\text{inp}})}(\phi) / \max_{\phi} G_{(\sigma_E^{\text{inp}})}, \quad L_I(\phi) = g_I \cdot G_{(\sigma_I^{\text{inp}})}(\phi) / \max_{\phi} G_{(\sigma_I^{\text{inp}})}. \quad (\text{S29})$$

332 Our next goal was to determine the connectivity profiles  $W_{XY}$  using Eq. S27. To this end, we used the  
 333 formula for the convolution of two wrapped Gaussian functions [35]

$$\frac{\sigma_2}{\sqrt{2\pi}\sigma_1(\sigma_2^2 - \sigma_1^2)^{1/2}} \int_{-\pi/2}^{\pi/2} G_{((\sigma_2^2 - \sigma_1^2)^{1/2})}(\phi - \phi') G_{(\sigma_1)}(\phi') d\phi' = G_{(\sigma_2)}(\phi). \quad (\text{S30})$$

Next, we combined Eq. S27 and Eq. S30 to obtain the wrapped Gaussian representation of  $W_{XY}$ . Using

$$(\tilde{r}_X(\phi))^{1/n} = G_{(\sigma_X^{\text{inp}})}(\phi) / \max_{\phi} G_{(\sigma_X^{\text{inp}})}, \quad \tilde{r}_Y(\phi) = G_{(\sigma_Y)}(\phi) / \max_{\phi} G_{(\sigma_Y)},$$

334 Eq. S27, and Eq. S30, we obtained

$$W_{XY}(\phi) = \frac{J_{XY} \cdot \sigma_X^{\text{inp}}}{\sqrt{2\pi} \cdot \sigma_Y \cdot ((\sigma_X^{\text{inp}})^2 - \sigma_Y^2)^{1/2}} \cdot \frac{\max_{\phi} G_{(\sigma_Y)}}{\max_{\phi} G_{(\sigma_X^{\text{inp}})}} \cdot G_{(((\sigma_X^{\text{inp}})^2 - \sigma_Y^2)^{1/2})}(\phi) \quad (\text{S31})$$

335 and

$$\sigma_{XY} = ((\sigma_X^{\text{inp}})^2 - \sigma_Y^2)^{1/2}. \quad (\text{S32})$$

336 For our recorded data, we obtained  $\sigma_{EE} = 33^\circ$ ,  $\sigma_{EI} = 19^\circ$ ,  $\sigma_{IE} = 42^\circ$ , and  $\sigma_{II} = 33^\circ$ .

### 337 Ascending order between the widths of connectivity profiles

338 The widths of connectivity profiles follow the order  $\sigma_{EI} < \sigma_{EE} < \sigma_{II} < \sigma_{IE}$  in each inferred parameter set.  
 339 However, this result would also follow for a specific order between only  $\sigma_E$ ,  $\sigma_I$  and  $\sigma_E^{\text{inp}}$ . Here we show that  
 340 the above derivations constrain the possible order of connectivity widths: independently of the exact values  
 341 of  $\sigma_E$  and  $\sigma_I$ , the assumptions

$$\sigma_E < \sigma_I, \quad \sigma_I < \sigma_E^{\text{inp}}, \quad n > 1 \quad (\text{S33})$$

always imply the relations

$$\sigma_{EI} < \sigma_{EE} < \sigma_{IE} \quad \sigma_{EI} < \sigma_{II} < \sigma_{IE}.$$

Indeed, since  $\sigma_E < \sigma_I$ , we always have  $\sigma_E^{\text{inp}} < \sigma_I^{\text{inp}}$  for  $n > 1$ . Based on this inequality and Eq. S33, we  
 obtain  $\sigma_E^2 < \sigma_I^2 < (\sigma_E^{\text{inp}})^2 < (\sigma_I^{\text{inp}})^2$ . Next, we obtain

$$(\sigma_E^{\text{inp}})^2 - \sigma_I^2 < (\sigma_E^{\text{inp}})^2 - \sigma_E^2 < (\sigma_I^{\text{inp}})^2 - \sigma_E^2$$

and

$$(\sigma_E^{\text{inp}})^2 - \sigma_I^2 < (\sigma_I^{\text{inp}})^2 - \sigma_I^2 < (\sigma_I^{\text{inp}})^2 - \sigma_E^2.$$

342 Together with Eq. S32, these chains of inequalities are equivalent to the relations  $\sigma_{EI} < \sigma_{EE} < \sigma_{IE}$  and  
 343  $\sigma_{EI} < \sigma_{II} < \sigma_{IE}$ . In particular, inequalities in Eq. S33 always imply that  $\sigma_{EI}$  is the smallest and  $\sigma_{IE}$  the  
 344 largest connectivity profile width, while  $\sigma_{EE}$  and  $\sigma_{II}$  are constrained between  $\sigma_{EI}$  and  $\sigma_{IE}$ .

The widths of the connectivity profiles need to follow the rank  $\sigma_{EI} < \sigma_{EE} \approx \sigma_{II} < \sigma_{IE}$  to balance out  
 the widths of the inputs to the populations in the recurrent network and achieve that the ultimate widths of  
 populations' activity profiles coincide with the observed ones. Precisely, the connectivity profile modifies  
 the width of the orientation-dependent activity profile  $R_Y$  of the population  $Y$ , together they shape the input  
 from the population  $Y$  to the population  $X$ . The total input to the population  $X$ , in the recurrent network

represented by the SSN model, is the sum of orientation-dependent inputs from E, I, and dLGN populations, Eq. 2

$$\int W_{XE} \cdot R_E - \int W_{XI} \cdot R_I + T_{dLGN} \cdot L_X.$$

This input is then transformed by the neuronal nonlinearity (power-law with the exponent  $n \approx 2$ ) and results in the orientation-dependent activity profile  $R_X$  of the population  $X$ . Hereby, the width of each orientation-dependent term ( $\int W_{XE} \tilde{r}_E$ ,  $\int W_{XI} \tilde{r}_I$  and  $L_X$ ) in the sum needs to be approximately equal to the width of the activity profile  $\tilde{r}_X^{1/n}$ . We show this in Eq. 4 using the contrast-invariance of orientation-dependent response.

The parameter  $\sigma$  of the wrapped Gaussian fit describes the width of orientation-dependent activity and connectivity profiles, Eq. S3. The wrapped Gaussian fit conveniently represents orientation-dependent activity and connectivity profiles because an analytical formula relates the widths  $\sigma$  of all the profiles in Eq. 4. Precisely, the relation  $\int W_{XY} \cdot \tilde{r}_Y = J_{XY} \tilde{r}_X^{1/n}$  implies that  $\sigma_{XY}^2 + \sigma_Y^2 = \sigma_{X,1/n}^2$ , whereby  $\sigma_{XY}$ ,  $\sigma_Y$ , and  $\sigma_{X,1/n}$  are the widths of the profiles  $W_{XY}$ ,  $\tilde{r}_Y$ , and  $\tilde{r}_{X,1/n}$ . In particular,  $\sigma_{EE}^2 + \sigma_E^2 = \sigma_{E,1/n}^2$  and  $\sigma_{EI}^2 + \sigma_I^2 = \sigma_{E,1/n}^2$ . Both expressions are equal to the same number  $\sigma_{E,1/n}^2$ . However,  $\sigma_E$  is smaller than  $\sigma_I$ , meaning that  $\sigma_{EI}$  has to be smaller than  $\sigma_{EE}$ . Analogously,  $\sigma_{IE}^2 + \sigma_E^2 = \sigma_{I,1/n}^2$  and  $\sigma_{II}^2 + \sigma_I^2 = \sigma_{I,1/n}^2$ . Both expressions are equal to the same number  $\sigma_{I,1/n}^2$  which is larger than  $\sigma_{E,1/n}^2$ . Thus, together with  $\sigma_E < \sigma_I$ , we obtain that  $\sigma_{II}$  is smaller than  $\sigma_{IE}$ , but both are larger than  $\sigma_{EI}$  and  $\sigma_{EE}$ , respectively, because  $\sigma_{I,1/n}$  is larger than  $\sigma_{E,1/n}$ .

## References

- [1] M. A. Spacek, G. Born, D. Crombie, Y. Bauer, X. Liu, S. Katzner, and L. Busse, "Robust effects of corticothalamic feedback during naturalistic visual stimulation," *bioRxiv*, Jun. 2021. doi: 10.1101/776237.
- [2] C. T. Rueden, J. Schindelin, M. C. Hiner, B. E. DeZonia, A. E. Walter, E. T. Arena, and K. W. Eliceiri, "ImageJ2: ImageJ for the next generation of scientific image data," *BMC Bioinformatics*, vol. 18, no. 1, p. 529, 2017.
- [3] J. Schindelin, I. Arganda-Carreras, E. Frise, V. Kaynig, M. Longair, T. Pietzsch, S. Preibisch, C. Rueden, S. Saalfeld, B. Schmid, *et al.*, "Fiji: An open-source platform for biological-image analysis," *Nature Methods*, vol. 9, no. 7, pp. 676–682, 2012.
- [4] M. Pachitariu, N. A. Steinmetz, S. N. Kadir, M. Carandini, and K. D. Harris, "Fast and accurate spike sorting of high-channel count probes with KiloSort," *Advances in Neural Information Processing Systems*, vol. 29, no. Nips, pp. 4448–4456, 2016, issn: 10495258.
- [5] M. A. Spacek, T. Blanche, and N. Swindale, "Python for large-scale electrophysiology," *Frontiers in Neuroinformatics*, vol. 2, p. 9, 2009, issn: 1662-5196. doi: 10.3389/neuro.11.009.2008.
- [6] G. Van Rossum and F. L. Drake, *Python 3 Reference Manual*. Scotts Valley, CA: CreateSpace, 2009, isbn: 1441412697.
- [7] D. Yatsenko, E. Y. Walker, and A. S. Tolias, "Datajoint: A simpler relational data model," *arXiv preprint arXiv:1807.11104*, 2018.
- [8] D. Kvitsiani, S. Ranade, B. Hangya, H. Taniguchi, J. Z. Huang, and A. Kepecs, "Distinct behavioural and network correlates of two interneuron types in prefrontal cortex," *Nature*, vol. 498, no. 7454, pp. 363–366, 2013, issn: 00280836. doi: 10.1038/nature12176.
- [9] U. Mitzdorf, "Current source-density method and application in cat cerebral cortex: Investigation of evoked potentials and EEG phenomena," *Physiological Reviews*, vol. 65, no. 1, pp. 37–100, 1985.

- 384 [10] K. H. Pettersen, A. Devor, I. Ulbert, A. M. Dale, and G. T. Einevoll, "Current-source density estimation  
385 based on inversion of electrostatic forward solution: Effects of finite extent of neuronal activity and  
386 conductivity discontinuities," *Journal of Neuroscience Methods*, vol. 154, no. 1-2, pp. 116–133, 2006,  
387 issn: 01650270. doi: 10.1016/j.jneumeth.2005.12.005.
- 388 [11] M. Denker, A. Yegenoglu, and S. Grün, "Collaborative HPC-enabled workflows on the HBP Collabora-  
389 tory using the Elephant framework," in *Neuroinformatics 2018*, 2018, P19. doi: 10.12751/incf.ni2018.0019.
- 391 [12] D. Heumann, G. Leuba, and T. Rabinowicz, "Postnatal development of the mouse cerebral neocortex.  
392 II. Quantitative cytoarchitectonics of visual and auditory areas," *Journal Fur Hirnforschung*, vol. 18,  
393 no. 6, pp. 483–500, 1977, issn: 0021-8359.
- 394 [13] P. Virtanen, R. Gommers, T. E. Oliphant, M. Haberland, T. Reddy, D. Cournapeau, E. Burovski, P.  
395 Peterson, W. Weckesser, J. Bright, *et al.*, "Scipy 1.0: Fundamental algorithms for scientific computing  
396 in python," *Nature Methods*, vol. 17, no. 3, pp. 261–272, 2020.
- 397 [14] L. J. Hubert, R. G. Golledge, and C. M. Costanzo, "Generalized procedures for evaluating spatial  
398 autocorrelation," *Geographical Analysis*, vol. 13, no. 3, pp. 224–233, 1981.
- 399 [15] C. R. Harris, K. J. Millman, S. J. van der Walt, R. Gommers, P. Virtanen, D. Cournapeau, E. Wieser,  
400 J. Taylor, S. Berg, N. J. Smith, R. Kern, M. Picus, S. Hoyer, M. H. van Kerkwijk, M. Brett, A. Haldane,  
401 J. F. del Río, M. Wiebe, P. Peterson, P. Gérard-Marchant, K. Sheppard, T. Reddy, W. Weckesser, H.  
402 Abbasi, C. Gohlke, and T. E. Oliphant, "Array programming with NumPy," *Nature*, vol. 585, no. 7825,  
403 pp. 357–362, Sep. 2020. doi: 10.1038/s41586-020-2649-2.
- 404 [16] S. J. Rey and L. Anselin, "PySAL: A Python Library of Spatial Analytical Methods," *The Review of*  
405 *Regional Studies*, vol. 37, no. 1, pp. 5–27, 2007.
- 406 [17] J. W. Peirce, "The potential importance of saturating and supersaturating contrast response functions  
407 in visual cortex," *Journal of Vision*, vol. 7, no. 6, pp. 1–10, 2007, issn: 15347362. doi: 10.1167/7.6.  
408 13.
- 409 [18] N. V. Swindale, "Orientation tuning curves: Empirical description and estimation of parameters," *Bio-*  
410 *logical Cybernetics*, vol. 78, no. 1, pp. 45–56, 1998, issn: 03401200. doi: 10.1007/s004220050411.
- 411 [19] T. Bonhoeffer, D.-S. Kim, D. Maloney, D. Shoham, and A. Grinvald, "Optical Imaging of the Layout of  
412 Functional Domains in Area 17 and Across the Area 17/18 Border in Cat Visual Cortex," *European*  
413 *Journal of Neuroscience*, vol. 7, no. 9, pp. 1973–1988, 1995.
- 414 [20] S. R. Olsen, D. S. Bortone, H. Adesnik, and M. Scanziani, "Gain control by layer six in cortical circuits  
415 of vision," *Nature*, vol. 483, no. 7387, pp. 47–54, 2012, issn: 00280836. doi: 10.1038/nature10835.
- 416 [21] S. Augustinaite and B. Kuhn, "Complementary Ca<sup>2+</sup> Activity of Sensory Activated and Suppressed  
417 Layer 6 Corticothalamic Neurons Reflects Behavioral State," *Current Biology*, vol. 30, no. 20, pp. 3945–  
418 3960, Aug. 2020, issn: 0960-9822. doi: 10.1016/j.cub.2020.07.069.
- 419 [22] D. J. Millman, G. K. Ocker, S. Caldejon, I. Kato, J. D. Larkin, E. K. Lee, J. Luviano, C. Nayan,  
420 T. V. Nguyen, K. North, S. Seid, C. White, J. Lecoq, C. Reid, M. A. Buice, and S. E. de Vries,  
421 "VIP interneurons in mouse primary visual cortex selectively enhance responses to weak but spe-  
422 cific stimuli," *eLife*, vol. 9, M. Vinck and K. M. Wassum, Eds., e55130, Oct. 2020, issn: 2050-084X.  
423 doi: 10.7554/eLife.55130.
- 424 [23] S. Bugeon, J. Duffield, M. Dipoppa, A. Ritoux, I. Prankerd, D. Nicoloutsopoulos, D. Orme, M. Shinn, H.  
425 Peng, H. Forrest, A. Viduolyte, C. B. Reddy, Y. Isogai, M. Carandini, and K. D. Harris, "A transcriptomic  
426 axis predicts state modulation of cortical interneurons," *Nature*, 2022, issn: 1476-4687. doi: 10.1038/  
427 s41586-022-04915-7.
- 428 [24] R. H. Masland and P. R. Martin, "The unsolved mystery of vision," *Current Biology*, vol. 17, no. 15,  
429 R577–R582, Aug. 2007, issn: 0960-9822. doi: 10.1016/j.cub.2007.05.040.

- 430 [25] N. Kraynyukova and T. Tchumatchenko, "Stabilized supralinear network can give rise to bistable,  
431 oscillatory, and persistent activity," *PNAS*, vol. 115, no. 13, pp. 3464–3469, 2018.
- 432 [26] X.-y. Ji, B. Zingg, L. Mesik, Z. Xiao, L. I. Zhang, and H. W. Tao, "Thalamocortical innervation pattern  
433 in mouse auditory and visual cortex: Laminar and cell-type specificity," *Cerebral Cortex*, vol. 26, no. 6,  
434 pp. 2612–2625, 2016.
- 435 [27] A. D. Lien and M. Scanziani, "Tuned thalamic excitation is amplified by visual cortical circuits," *Nature  
436 Neuroscience*, vol. 16, no. 9, pp. 1315–1323, 2013.
- 437 [28] K. Reinhold, A. D. Lien, and M. Scanziani, "Distinct recurrent versus afferent dynamics in cortical  
438 visual processing," *Nature Neuroscience*, vol. 18, no. 12, pp. 1789–1797, Dec. 2015, issn: 1546-1726.  
439 doi: 10.1038/nn.4153.
- 440 [29] Y. T. Li, L. A. Ibrahim, B. H. Liu, L. I. Zhang, and H. W. Tao, "Linear transformation of thalamocortical  
441 input by intracortical excitation," *Nature Neuroscience*, vol. 16, no. 9, pp. 1324–1330, 2013, issn:  
442 10976256. doi: 10.1038/nn.3494.
- 443 [30] Allen Institute for Brain Science, *Synaptic physiology coarse matrix dataset*, Available from: [https://brain-  
444 map.org/explore/connectivity/synaptic-physiology](https://brain-map.org/explore/connectivity/synaptic-physiology), 2019.
- 445 [31] X. Jiang, S. Shen, C. R. Cadwell, P. Berens, F. Sinz, A. S. Ecker, S. Patel, and A. S. Tolias, "Princi-  
446 ples of connectivity among morphologically defined cell types in adult neocortex," *Science*, vol. 350,  
447 no. 6264, aac9462, Nov. 2015, issn: 0036-8075, 1095-9203. doi: 10.1126/science.aac9462.
- 448 [32] Y. Gonchar, Q. Wang, and A. H. Burkhalter, "Multiple distinct subtypes of gabaergic neurons in mouse  
449 visual cortex identified by triple immunostaining," *Frontiers in neuroanatomy*, vol. 2, p. 3, 2008.
- 450 [33] A. Sanzeni, B. Akitake, H. C. Goldbach, C. E. Leedy, N. Brunel, and M. H. Histed, "Inhibition stabi-  
451 lization is a widespread property of cortical networks," *eLife*, vol. 9, T. O'Leary, J. Huguenard, and  
452 H. Adesnik, Eds., e54875, Jun. 2020, issn: 2050-084X. doi: 10.7554/eLife.54875.
- 453 [34] K. D. Miller and A. Palmigiano, "Generalized paradoxical effects in excitatory/inhibitory networks,"  
454 *bioRxiv*, 2020.
- 455 [35] K. Mardia and P. Jupp, *Directional Statistics*, ser. Wiley Series in Probability and Statistics. Wiley,  
456 2009, isbn: 9780470317815.
- 457 [36] S. B. Hofer, H. Ko, B. Pichler, J. Vogelstein, H. Ros, H. Zeng, E. Lein, N. A. Lesica, and T. D. Mrsic-  
458 Flogel, "Differential connectivity and response dynamics of excitatory and inhibitory neurons in visual  
459 cortex," *Nature Neuroscience*, vol. 14, no. 8, pp. 1045–52, 2011. doi: 10.1038/nn.2876.
- 460 [37] H. Ko, S. B. Hofer, B. Pichler, K. A. Buchanan, P. J. Sjöström, and T. D. Mrsic-Flogel, "Functional  
461 specificity of local synaptic connections in neocortical networks," *Nature*, vol. 473, no. 7345, pp. 87–  
462 91, 2011, issn: 00280836. doi: 10.1038/nature09880.
- 463 [38] L. Cossell, M. F. Iacaruso, D. R. Muir, R. Houlton, E. N. Sader, H. Ko, S. B. Hofer, and T. D. Mrsic-  
464 Flogel, "Functional organization of excitatory synaptic strength in primary visual cortex," *Nature*,  
465 vol. 518, no. 7539, pp. 399–403, 2015, issn: 14764687. doi: 10.1038/nature14182.
- 466 [39] S. C. Seeman, L. Campagnola, P. A. Davoudian, A. Hoggarth, T. A. Hage, A. Bosma-Moody, C. A.  
467 Baker, J. H. Lee, S. Mihalas, C. Teeter, *et al.*, "Sparse recurrent excitatory connectivity in the micro-  
468 circuit of the adult mouse and human cortex," *Elife*, vol. 7, e37349, 2018.
- 469 [40] M. M. Karnani, J. Jackson, I. Ayzenshtat, J. Tucciarone, K. Manoocheri, W. G. Snider, and R. Yuste,  
470 "Cooperative subnetworks of molecularly similar interneurons in mouse neocortex," *Neuron*, vol. 90,  
471 no. 1, pp. 86–100, 2016.
- 472 [41] J. A. Mazer, W. E. Vinje, J. McDermott, P. H. Schiller, and J. L. Gallant, "Spatial frequency and  
473 orientation tuning dynamics in area V1," *Proceedings of the National Academy of Sciences of the  
474 United States of America*, vol. 99, no. 3, pp. 1645–1650, 2002, issn: 00278424. doi: 10.1073/pnas.  
475 022638499.

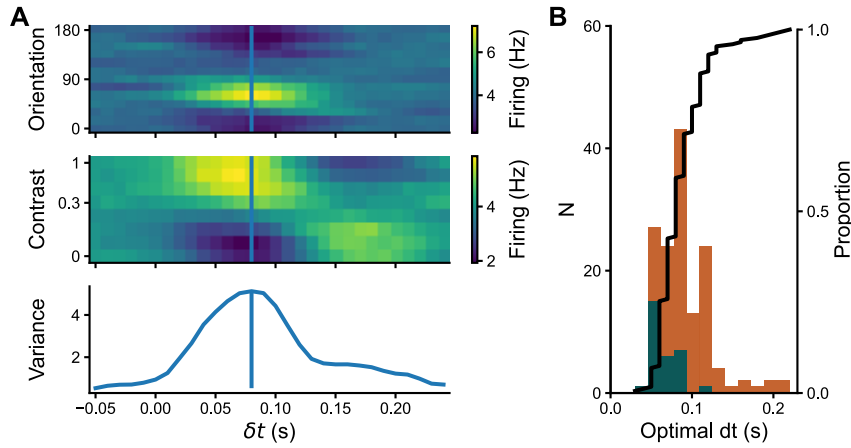

**Fig. S1. Reverse correlation and optimal response time point** (related to Fig. 2). **A**, Reverse correlation analysis for an example V1 neuron. Reverse correlation computes the firing rate at a time point  $\delta t$  relative to stimulus occurrence, yielding temporal kernels for each stimulus combination (*Middle*: orientation; *bottom*: contrast; average across all other stimulus dimensions for visualization). The optimal response time was calculated by using the sum of the aggregated variances in firing rate across stimulus conditions (*top*, see Supplementary Information) and selecting its peak as the latency of optimal response (*vertical line*) [41]. **B**, Distribution of optimal response times (after application of a latency cutoff of  $> 25$  ms, which removed 7 neurons with implausibly short latencies) (*teal*: inhibitory, *orange*: excitatory, *black*: cumulative distribution). Inhibitory neurons had a significantly lower optimal response time ( $69 \pm 3$  ms) than excitatory neurons ( $89 \pm 3$  ms; mean  $\pm$  sem; two-tailed Welch's  $t$ -Test:  $t=5.18$ ,  $p < .001$ ; 174 neurons).

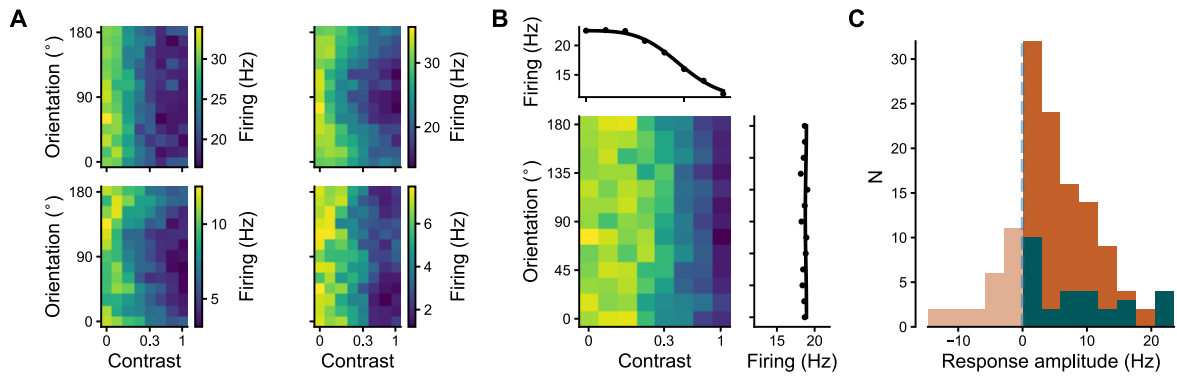

**Fig. S2. Suppressed-by-contrast neurons (SbC)** (related to Fig. 2). **A**, Four example SbC neurons, characterized by their stronger response to low contrast and an increasing suppression with higher contrasts. **B**, Two-dimensional tuning model fitted to an SbC neuron. **C**, Distribution of response amplitudes, defined as the difference between responses to 100% and 0% contrast. SbC neurons, defined by their negative response amplitude, were found within the broad-spiking, putative excitatory neurons (24/125, *transparent*). Since SbC neurons might correspond to VIP interneurons [22], [23] or a so-far minimally studied class of Sncg interneurons [23], SbC neurons were excluded from further analysis (see also Results).



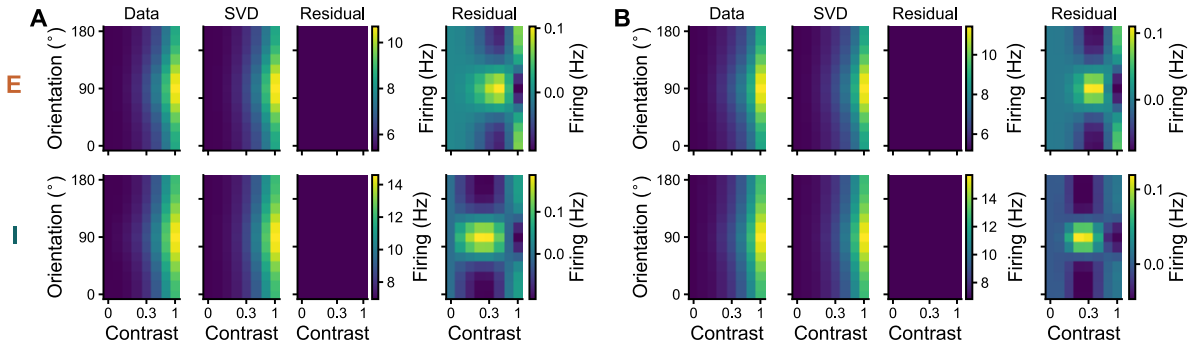

**Fig. S3. Contrast-invariance of V1 population response** (related to Fig. 2–Fig. 5. *Top*: excitatory, *bottom* inhibitory. **A**, Population response for two-dimensional tuning model using hyperbolic ratio function and wrapped Gaussian. Residuals are shown once on the same scale as the data and once on a separate scale. The residuals show a significant, but very weak pattern (E:  $g_z = 10.41$ , residual strength < 0.1%; I:  $g_z = 14.31$ , residual strength = 0.1%). **B**, Same as (A) for two-dimensional tuning model using model-free contrast response and wrapped Gaussian, as used in Fig. 3 and Fig. 5 (E:  $g_z = 11.58$ , residual strength < 0.1%; I:  $g_z = 15.07$ , residual strength < 0.1%). We suspect that the small, albeit significant, spatial pattern in the residual suggests a contribution of supersaturating units, which cannot be captured by a separable model of orientation and contrast. In addition, in our population of recorded neurons, contrast sensitivity is not entirely equally distributed Fig. 2L, which could contribute to the small residual.

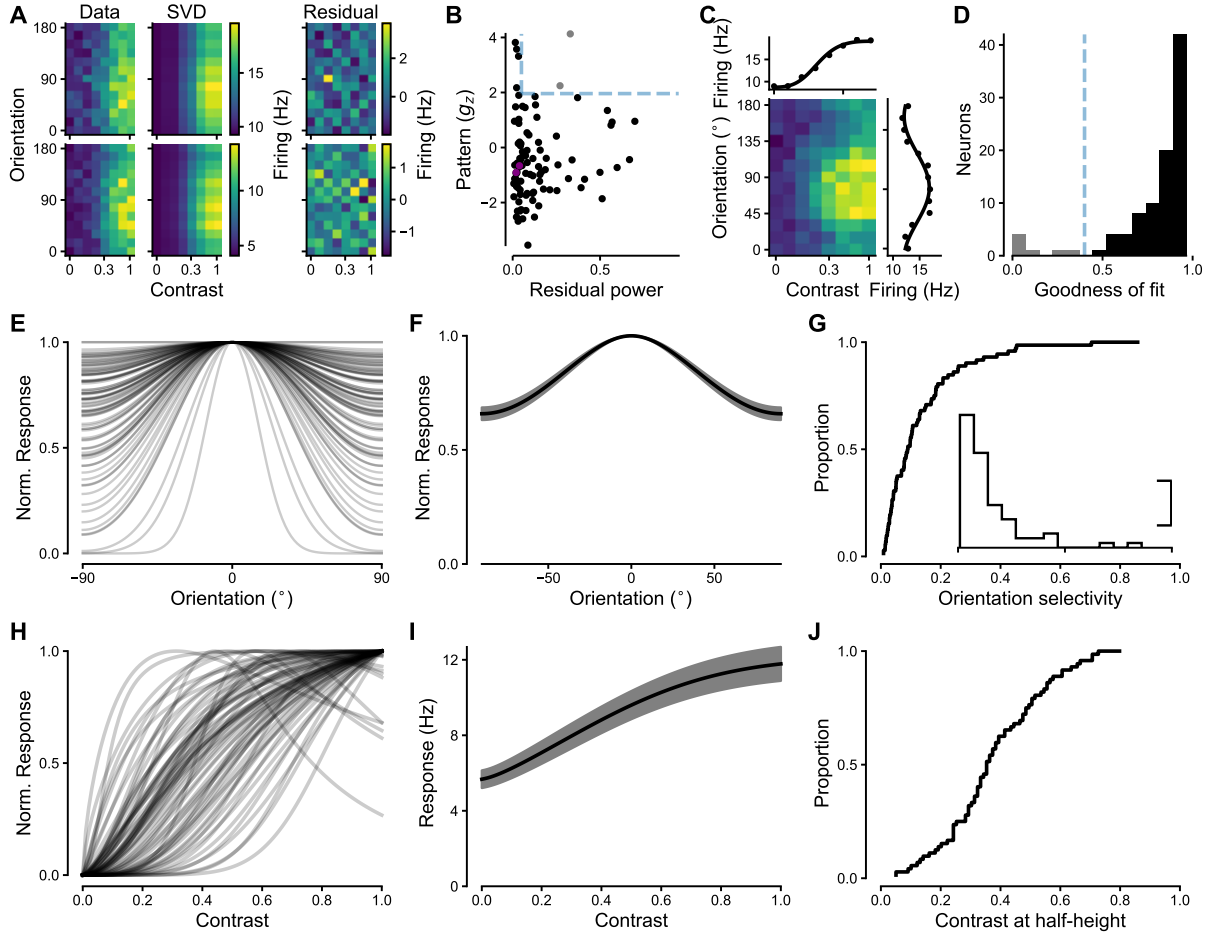

**Fig. S4. Responses in dLGN** (related to Fig. 2). **A**, Responses of two dLGN example neurons to combinations of orientation and contrast (*left*), first SVD component (*middle*) and SVD residual (*right*). For both examples, the absence of significant spatial patterns indicate that contrast invariance is not substantially violated (*Top*:  $g_z = -0.66$ ,  $p = 0.96$ ; *bottom*:  $g_z = -0.91$ ,  $p = 0.98$ ). **B**, Violations of contrast invariance were assessed by the power of the SVD residual ( $> 5\%$ ) and significance of spatial autocorrelation ( $g_z > 1.96$ ). *Light dots*: contrast-dependent neurons (2/98 dLGN neurons); *solid dots*: contrast-invariant neurons; *pink dots*: example neurons from (A) (96/98 dLGN neurons). **C**, Two-dimensional tuning fit consisting of a product of a hyperbolic ratio function and a wrapped Gaussian [18] for an example dLGN neuron. **D**, Distribution of fit quality across dLGN neurons. *Dashed line*: fit quality threshold (0.4). *Solid bars*: neurons considered for further analysis (89/96 dLGN neurons; mean  $R^2 = 0.79$ ). **E**, Normalized orientation tuning component of the dLGN neurons with rising contrast response functions (72/89 neurons). **F**, Averaged normalized orientation tuning component. **G**, Cumulative distribution of orientation selectivity [OSI; 19], [20]. Mean OSI of the contrast-invariant dLGN population:  $0.14 \pm 0.02$  (mean  $\pm$  sem). *Inset*: Density histogram of orientation selectivity. Same x-axis as cumulative distribution, y-scale bar represents 2 neurons per bin of OSI. **H–J**, Same as (E–G) for normalized contrast response component and cumulative distribution of contrast sensitivity (contrast at which the contrast response function reaches half height). Mean contrast at half-height  $0.39 \pm 0.02$ , 72 dLGN neurons.

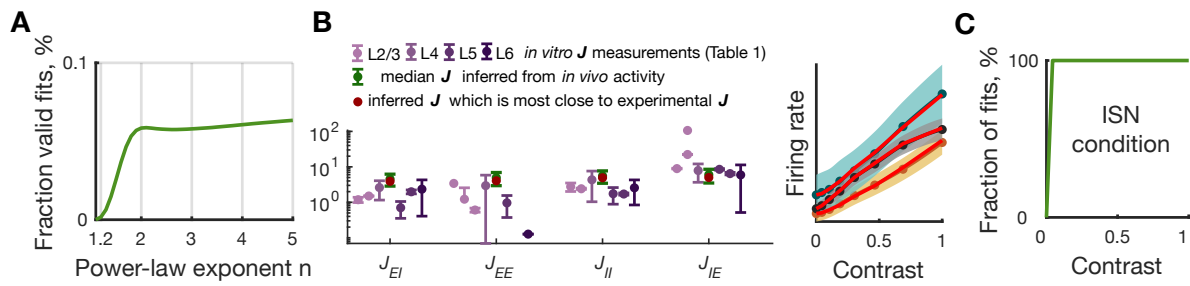

**Fig. S5. Inference of connectivity parameters from contrast responses** (related to Fig. 3). **A**, The fraction of valid initial connectivity weights is an increasing function of  $n$  with few valid fits found for  $n$  close to 1. **B**, *Left*: The presented inferred set of connectivity weights (red) is the closest to the weighted average of connectivity constants across layers (purple) extracted from experimental sources **Table S1**. *Right*: The inferred parameters set (red, left) leads to a close approximation of the average recorded contrast responses. **C**, Starting from the smallest measured contrast value of 4%, the SSN model represented an inhibition stabilized network for all inferred connectivity weights.

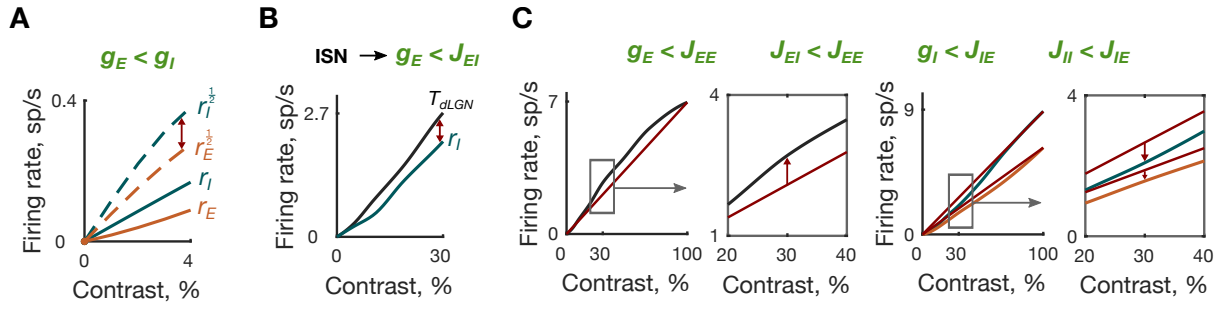

**Fig. S6. Shape and magnitude of cortical and thalamic contrast responses and ISN property determine a series of relationships between the V1 connectivity weights** (related to Fig. 3 and Fig. 4). **A**, For low contrasts, the firing rates  $r_X$  are smaller than  $r_X^{\frac{1}{2}}$  and have a negligible impact on Eq. S10. Since  $r_E^{\frac{1}{2}} < r_I^{\frac{1}{2}}$ , the inequality  $g_E < g_I$  must be satisfied to compensate the difference between the firing rates in Eq. S10 for small contrasts. **B**, Eq. S12 implies that the connectivity weight  $J_{EI}$  exceeds  $g_E$  in the SSN model when the SSN satisfies the ISN condition, and there exists an interval of contrasts, for which the dLGN firing rate grows faster than the I population firing rate  $r_I$ , as found in our activity recordings. **C**, There exist an interval of contrasts for which the recorded thalamic contrast response  $T_{dLGN}$  lies above (left panels), while the firing rates  $r_E$  and  $r_I$  lie below the straight lines (red lines) connecting their zero and 100% contrast values (right panels). Additionally, the deviation of the I contrast response from its linear increase exceeds that of the E response. These properties of contrast responses can explain why  $J_{IE}$  is the strongest connectivity weight targeting the I population, and  $J_{EE}$  is the strongest weight targeting the E population in the inferred connectivity sets (Eq. S15-Eq. S17 in Supplementary Information).

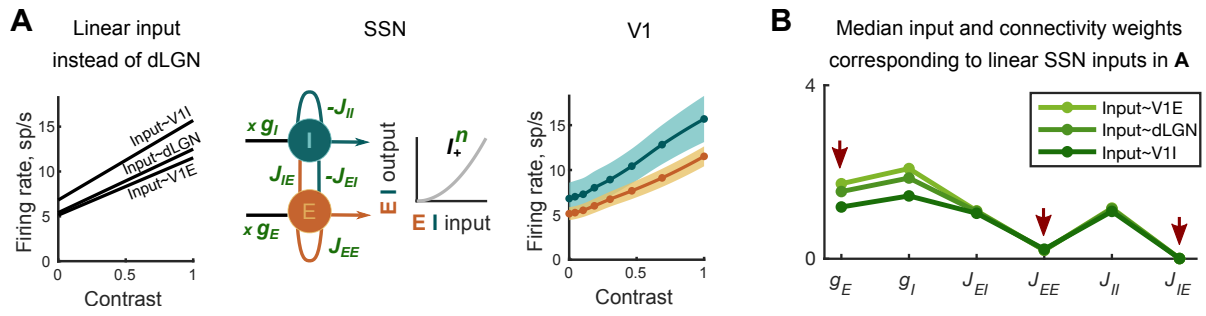

**Fig. S7. Inference of connectivity parameters for linear inputs instead of recorded dLGN input** (related to Fig. 3 and Fig. 4). **A**, Linear inputs (*left*), instead of recorded dLGN input introduced in Fig. 3A, Fig. S4, were used for the inference of input and connectivity weights  $g_X$  and  $J_{XY}$  of the SSN model (*middle*). The linear inputs (*left*) have the same values for the contrast  $C = 0$  and  $C = 100\%$  as the recorded contrast response functions of the E, dLGN, and I populations, respectively. The connectivity parameters were computed using the same method as in Fig. 3C to generate the thalamo-cortical mapping of linear inputs to the recorded V1 contrast responses (*right*). **B**, The inferred parameters  $g_X$  and  $J_{XY}$  followed a different order than the order found for the parameters determined from the recorded dLGN contrast response. Inconsistent with direct experimental measurements,  $J_{EE}$  was smaller than  $g_E$  and  $J_{IE}$  was the smallest connectivity weight for all three linear inputs (*red arrows*).

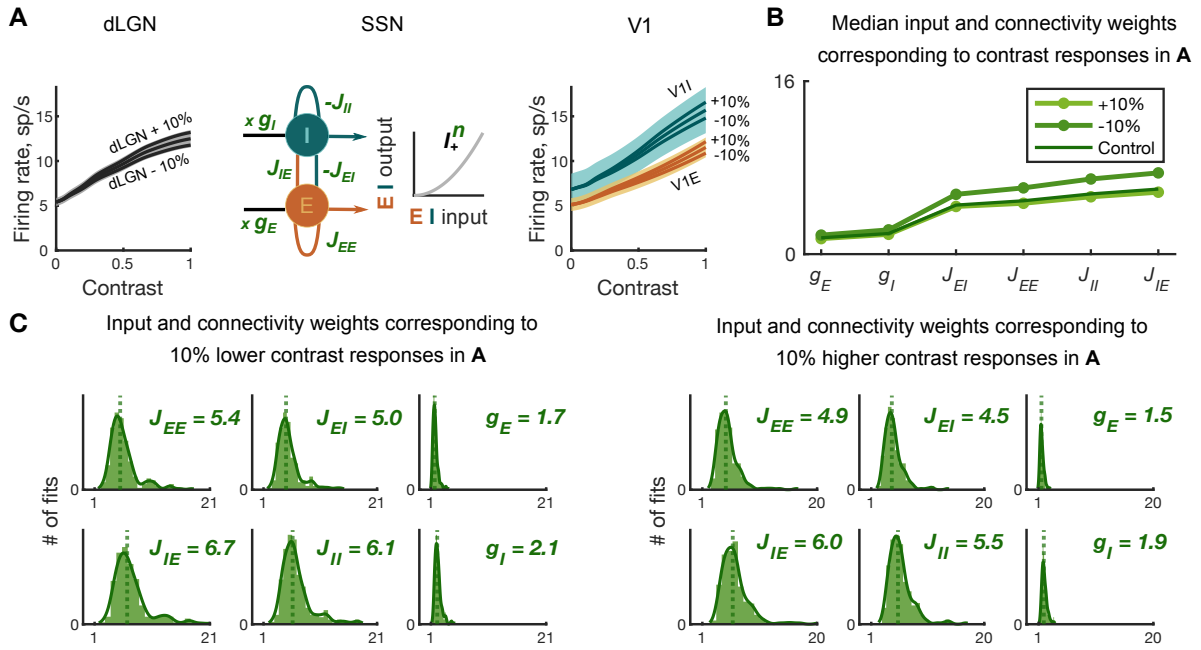

**Fig. S8. Inference of connectivity parameters for modified contrast responses** (related to Fig. 3). **A**, To compute connectivity and input weights for slight modifications of recorded responses, all three average contrast responses (dLGN, V1E, and V1I) were either increased or decreased by 10% accordingly to the relations  $(FR-FR(0)) \cdot 1.1$  and  $(FR-FR(0)) \cdot 0.9$ , where  $FR$  denotes firing rate. **B**, In both cases most of the inferred weights followed the order found for average contrast responses. **C**, While medians of weights corresponding to decreased contrast responses remained almost the same, the medians of weights computed from increased responses were up to 13% higher.

| Layer 2/3  |                   |                |                     |                    |                     |                                        |                   |
|------------|-------------------|----------------|---------------------|--------------------|---------------------|----------------------------------------|-------------------|
|            | Hofer et al. [36] | Ko et al. [37] | Cossell et al. [38] | Seeman et al. [39] | Karnani et al. [40] | Allen Institute for Brain Science [30] | Jiang et al. [31] |
| $CP_{EI}$  |                   |                |                     |                    |                     | 17/49                                  | 27/83             |
| $PSP_{EI}$ |                   |                |                     |                    |                     | 0.31±0.20                              | 0.42±0.03         |
| $J_{EI}$   |                   |                |                     |                    |                     | 1.18±0.76                              | 1.50±0.11         |
| $CP_{EE}$  | 45/235            | 43/222         | 75/520              | 13/130             |                     | 5/80                                   | 1/50              |
| $PSP_{EE}$ | 0.2               |                | 0.45±0.68           | 0.34±0.32          |                     | 0.22±0.24                              | 0.34±0.08         |
| $J_{EE}$   | 3.41              |                | 5.78±8.73           | 3.03±2.85          |                     | 1.22±1.34                              | 0.61±0.14         |
| $CP_{II}$  |                   |                |                     |                    | 13/32               | 36/97                                  | 28/78             |
| $PSP_{II}$ |                   |                |                     |                    | 0.58±0.10           | 0.66±0.74                              | 0.61±0.10         |
| $J_{II}$   |                   |                |                     |                    | 2.59±0.45           | 2.69±3.02                              | 2.41±0.39         |
| $CP_{IE}$  | 36/41             |                |                     |                    |                     | 19/50                                  | 13/83             |
| $PSP_{IE}$ | 1.36              |                |                     |                    |                     | 0.27±0.21                              | 1.6±0.23          |
| $J_{IE}$   | 106.28            |                |                     |                    |                     | 9.13±7.10                              | 22.30±3.21        |

  

| Layer 4    |                                        | Layer 5    |                                        |                   | Layer 6    |                                        |
|------------|----------------------------------------|------------|----------------------------------------|-------------------|------------|----------------------------------------|
|            | Allen Institute for Brain Science [30] |            | Allen Institute for Brain Science [30] | Jiang et al. [31] |            | Allen Institute for Brain Science [30] |
| $CP_{EI}$  | 7/34                                   | $CP_{EI}$  | 10/72                                  | 8/32              | $CP_{EI}$  | 16/69                                  |
| $PSP_{EI}$ | 1.15±0.64                              | $PSP_{EI}$ | 0.46±0.35                              | 0.72±0.09         | $PSP_{EI}$ | 0.92±0.76                              |
| $J_{EI}$   | 2.60±1.45                              | $J_{EI}$   | 0.7±0.53                               | 1.98±0.25         | $J_{EI}$   | 2.35±1.94                              |
| $CP_{EE}$  | 17/236                                 | $CP_{EE}$  | 13/553                                 | 0/12              | $CP_{EE}$  | 3/443                                  |
| $PSP_{EE}$ | 0.46±0.45                              | $PSP_{EE}$ | 0.46±0.59                              |                   | $PSP_{EE}$ | 0.21                                   |
| $J_{EE}$   | 2.95±2.88                              | $J_{EE}$   | 0.96±1.23                              |                   | $J_{EE}$   | 0.13                                   |
| $CP_{II}$  | 26/55                                  | $CP_{II}$  | 27/126                                 | 9/48              | $CP_{II}$  | 41/118                                 |
| $PSP_{II}$ | 0.83±0.63                              | $PSP_{II}$ | 0.74±0.86                              | 0.83±0.12         | $PSP_{II}$ | 0.67±0.45                              |
| $J_{II}$   | 4.32±3.28                              | $J_{II}$   | 1.74±2.03                              | 1.71±0.25         | $J_{II}$   | 2.56±1.72                              |
| $CP_{IE}$  | 4/33                                   | $CP_{IE}$  | 7/74                                   | 3/36              | $CP_{IE}$  | 11/76                                  |
| $PSP_{IE}$ | 0.73±0.39                              | $PSP_{IE}$ | 1.01±0.41                              | 0.87±0.07         | $PSP_{IE}$ | 0.46±0.42                              |
| $J_{IE}$   | 7.88±4.21                              | $J_{IE}$   | 8.50±3.45                              | 6.45±0.52         | $J_{IE}$   | 5.93±5.41                              |

Table S1: **Connectivity matrix for pyramidal and PV+ neurons in layers 2/3, 4, 5, and 6, summarized from recent *in vitro* studies.** The entries of the connectivity matrix  $J_{XY}$  are computed for each layer based on the experimentally measured connection probability (CP) and amplitude of the postsynaptic potential in mV (PSP) using the formula  $J_{XY} = CP * PSP * N_Y/N * 100\%$ , where  $N_Y/N$  is the proportion of neurons in the population  $N_Y$ . Here we use  $N_E/N = 0.89$  and  $N_I/N = 0.11$  [32] (see Results).
